# Supplementary material for: Models of care for people with dementia approaching end of life: A rapid review
Source: PubMed Central journal article supplement (PMC10336605; doi:10.1177/02692163231171181), 2023-05-07
Supplement: sj-pdf-1-pmj-10.1177_02692163231171181.pdf [file sj-pdf-1-pmj-10.1177_02692163231171181.pdf]

### Supplementary file 1: Search strategy – Medline (Ovid)

- 1 exp Dementia/
- 2 "dement\*".ab,ti.
- 3 "alzheimer\*".ab,ti.
- 4 1 or 2 or 3
- 5 Palliative Care/
- 6 Terminal Care/
- 7 Hospice Care/
- 8 exp Advance Care Planning/
- 9 Attitude to Death/
- 10 exp Bereavement/
- 11 Hospices/
- 12 exp Life Support Care/
- 13 Terminally Ill/
- 14 Death/
- 15 "palliat\*".ab,ti.
- 16 "hospice\*".ab,ti.
- 17 "end of life".ab,ti.
- 18 "terminal care".ab,ti.
- 19 5 or 6 or 7 or 8 or 9 or 10 or 11 or 12 or 13 or 14 or 15 or 16 or 17 or 18
- 20 "Delivery of Health Care"/og [Organization & Administration]
- 21 "Delivery of Health Care, Integrated"/
- 22 exp Patient Care Team/
- 23 Patient-Centered care/ or exp Patient Navigation/
- 24 "model\* of care ".ab,ti.
- 25 "care path\* ".ab,ti.
- 26 framework\*.ab,ti.
- 27 program\*.ab,ti.
- 28 continuity.ab,ti.

29 seamless\*.ab,ti.  
30 20 or 21 or 22 or 23 or 24 or 25 or 26 or 27 or 28 or 29  
31 4 and 19 and 30  
32 limit 31 to (english language and yr="2000 -Current")
