# Supplementary material for: Models of care for people with dementia approaching end of life: A rapid review
Source: PubMed Central journal article supplement (PMC10336605; doi:10.1177/02692163231171181), 2023-05-07
Supplement: sj-pdf-2-pmj-10.1177_02692163231171181.pdf [file sj-pdf-2-pmj-10.1177_02692163231171181.pdf]

**Supplementary File 2: resource review template for included models of care**

|                                                                                                                  |  |
|------------------------------------------------------------------------------------------------------------------|--|
| <b>Reference:</b>                                                                                                |  |
| Is a model of care described?                                                                                    |  |
| Is a model of care evaluated?                                                                                    |  |
| To be included in the review? Y/N<br>(include reason/s for inclusion or exclusion)                               |  |
|                                                                                                                  |  |
| <b>Context</b>                                                                                                   |  |
| • Country, region, locality                                                                                      |  |
| • Target/priority population(s) - incl. CALD, indigenous                                                         |  |
| • Care setting , eg all; community; home; primary care; acute care; hospice, etc.                                |  |
|                                                                                                                  |  |
| <b>Intervention/strategy type</b>                                                                                |  |
| Is an intervention or strategy described? If so, provide a brief description.                                    |  |
|                                                                                                                  |  |
| <b>Model of care</b>                                                                                             |  |
| 1. Person-centred care? Patients, carers or families involved?                                                   |  |
| 2. Is continuity of care/ care coordination demonstrated? What are the referral pathways / access opportunities? |  |

|                                                                                                                                                                                                                                                                   |  |
|-------------------------------------------------------------------------------------------------------------------------------------------------------------------------------------------------------------------------------------------------------------------|--|
| 3. Is care multidisciplinary and/or across sectors within health? If so, which disciplines deliver care in which settings? (eg. Specialist palliative nurses in hospices and in the home)                                                                         |  |
| 4. Is there evidence of cross-sectoral collaboration, eg health, social care, not for profit groups, community groups?                                                                                                                                            |  |
| 5. Is funding described? If so, how is the MoC or program funded?                                                                                                                                                                                                 |  |
| 6. Are governance and accountability described? If so, what is the governance structure, how do accountability and reporting work?                                                                                                                                |  |
|                                                                                                                                                                                                                                                                   |  |
| <b>Findings</b>                                                                                                                                                                                                                                                   |  |
| Brief description                                                                                                                                                                                                                                                 |  |
|                                                                                                                                                                                                                                                                   |  |
| <b>Evaluation</b>                                                                                                                                                                                                                                                 |  |
| Has the MoC been evaluated? If so, how? Eg. Anecdotal feedback, pre- and post-program (validated scales, interviews, mixed methods), control group, matched cases and controls, cohort study, RCT, systematic review, qualitative (interviews, focus groups, etc) |  |
| <ul style="list-style-type: none"> <li>Costs of care</li> </ul>                                                                                                                                                                                                   |  |

|                                                                           |  |
|---------------------------------------------------------------------------|--|
| • Care experiences                                                        |  |
| • Care outcomes                                                           |  |
| • Utilisation of services                                                 |  |
| • Other                                                                   |  |
|                                                                           |  |
| <b>Related articles/reports</b>                                           |  |
| If you become aware of any related articles or reports, record them here. |  |
| Reference lists checked?                                                  |  |
